# Supplementary material for: Krankenhausinzidenz, stationäre Versorgung und Outcome der peripheren arteriellen Verschlusskrankheit und arteriellen Thrombose/Embolie in Deutschland von 2005 bis 2018
Source: Springer Nature journal article supplement (doi:10.1007/s00772-020-00677-6), 2020-08-07
Supplement: MOESM1 [file 18257562]

# **Krankenhausinzidenz, stationäre Versorgung und Outcome der peripheren arteriellen Verschlusskrankheit und arteriellen Thrombose / Embolie in Deutschland von 2005 bis 2018**

A. Kühnl<sup>1</sup>, E. Knipfer<sup>1</sup>, T. Lang<sup>1</sup>, B. Bohmann<sup>1</sup>,  
M. Trenner<sup>1</sup>, H.-H. Eckstein<sup>1</sup>

1. Klinik und Poliklinik für Vaskuläre und Endovaskuläre Chirurgie, Klinikum rechts der Isar,  
Technische Universität München, München, Deutschland

## **Korrespondenzadresse:**

Prof. Dr. A. Kühnl, MPH, MBA

Klinik und Poliklinik für Vaskuläre und Endovaskuläre Chirurgie

Klinikum rechts der Isar der Technischen Universität München

Ismaninger Straße 22

81675 München

Tel.: (089) 4140 2167

Fax: (089) 4140 4861

E-Mail: [a.kuehnl@tum.de](mailto:a.kuehnl@tum.de)

## Appendix:

Abbildung 7: Krankenhausmortalität in 2017 differenziert nach Altersgruppen und Geschlecht.

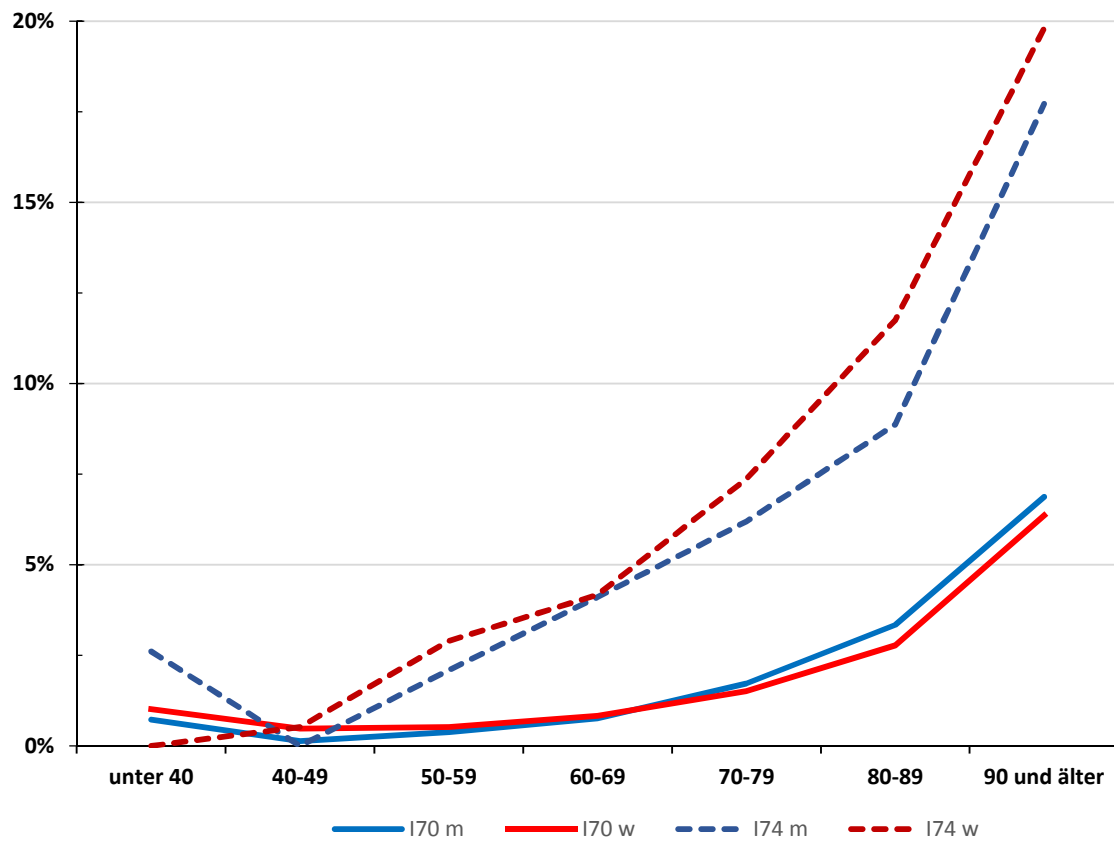

I70 = pAVK, I74 = arterielle Embolie, m = männlich, w = weiblich

Tabelle 5: Falldefinitionen gemäß ICD-10-GM

|                           | 2005 – 2014      | 2015 – 2018      |
|---------------------------|------------------|------------------|
| <b>pAVK I/IIa</b>         | I70.20           | I70.20<br>I70.21 |
| <b>pAVK IIb</b>           | I70.21           | I70.22           |
| <b>pAVK III</b>           | I70.22           | I70.23           |
| <b>pAVK IV</b>            | I70.23<br>I70.24 | I70.24<br>I70.25 |
| <b>Arm pAVK</b>           | I70.25           | I70.26           |
| <b>Arterielle Embolie</b> | I74.*            | I74.*            |

Die pAVK der oberen Extremität ist hier nur der Vollständigkeit halber aufgeführt.

Tabelle 6: Falldefinitionen der offen-chirurgischen Verfahren (A1-3), der endovaskulären Verfahren (B), der Verfahren bei arterieller Embolie (C) und Amputationen (D) gemäß Operationen- und Prozedurenschlüssel (OPS) der Jahre 2005 bis 2018. Quelle: [www.dimdi.de](http://www.dimdi.de)

### A1) TEA, Patchplastiken und andere offene Verfahren:

| OPS Code | Beschreibung                | Lokalisation: 5./6.Stelle * =             |                                                   |
|----------|-----------------------------|-------------------------------------------|---------------------------------------------------|
| 5-381.** | TEA und Patchplastik        | .33/.34/.35<br>.5* ohne .51<br>.7*<br>.8* | Aorta<br>Iliacal<br>Oberschenkel<br>Unterschenkel |
| 5-382.** | Resektion von Blutgefäßen   |                                           |                                                   |
| 5-383.** | Resektion und Interposition |                                           |                                                   |
| 5-388.** | Naht von Blutgefäßen        |                                           |                                                   |
| 5-389.** | Operativer Verschluss       |                                           |                                                   |
| 5-395.** | Patchplastiken              |                                           |                                                   |
| 5-396.** | Transpositionen             |                                           |                                                   |
| 5-397.** | Andere Rekonstruktionen     |                                           |                                                   |

Die Codes .35/.56/.73/.87 „Gefäßprothese“ existieren erst ab 2010

### A2) Bypässe inkl. Prothesen:

| OPS: 5-393.**    | Als proximaler Anschluss<br>Lokalisation: 5./6.Stelle * = | Als distaler Anschluss<br>Lokalisation: 5./6.Stelle * = |                           |
|------------------|-----------------------------------------------------------|---------------------------------------------------------|---------------------------|
| Axilla/Subclavia | .13/.14/.17/.18                                           | entfällt                                                |                           |
| Aortal           | .3* ohne .30/.31/.32                                      | entfällt                                                |                           |
| Iliacal          | .4* ohne .48/.49                                          | .33/.35<br>.41                                          |                           |
| Femoral          | .5*                                                       | .13/.14/.17/.18<br>.36/.42/.51/.57                      |                           |
| Popliteal        | .6*                                                       | .38<br>.43<br>.52                                       | nicht näher bezeichnet    |
|                  |                                                           | .44/.53                                                 | oberhalb des Kniegelenks  |
|                  |                                                           | .45/.54                                                 | unterhalb des Kniegelenks |
| Crural           | .7*                                                       | .46/.55/.61                                             |                           |
| Pedal            | entfällt                                                  | .56/.62                                                 |                           |

Die Codes .34 „Aortobiliacal“ und .39 „Aortobipopliteal“ existieren bis 2006, ab 2007 nicht mehr vorhanden. Die Codes .9\* „Temporärer arterio-arterieller Shunt (intraoperativ)“ und .x/.y wurden ausgeschlossen.

### A3) Revisionen:

| OPS: 5-394.* | Beschreibung                                           | Lokalisation:                                              |
|--------------|--------------------------------------------------------|------------------------------------------------------------|
| .0           | Operative Behandlung einer Blutung nach Gefäßoperation | Lokalisation<br>unspezifisch, keine<br>6.Stelle vorgesehen |
| .1           | Revision einer Anastomose                              |                                                            |
| .2           | Revision eines vaskulären Implantates                  |                                                            |
| .3           | Wechsel eines vaskulären Implantates                   |                                                            |
| .4           | Entfernung eines vaskulären Implantates                |                                                            |

Diese Zusatz-Codes werden nach Ansicht der Autoren überwiegend bei peripheren Bypässen am Bein verwendet. Daher wurden sie in dieser Analyse eingeschlossen, jedoch separat in den Ergebnissen präsentiert um eine Vermischung mit den spezifischen und lokalisierbaren Codes zu verhindern. Insbesondere im Hinblick auf die große ökonomische Bedeutung dieser Codes im Rahmen der DRG Abrechnung wird in der Diskussion speziell darauf eingegangen.

## B) PTAs und Stents:

| #E1.* | OPS Code                                                                                       | Beschreibung                                                                              | Lokalisation: 6.Stelle * =                                                  |                                      |
|-------|------------------------------------------------------------------------------------------------|-------------------------------------------------------------------------------------------|-----------------------------------------------------------------------------|--------------------------------------|
| #E1.1 | 8-836.0*                                                                                       | PTAs (klassische Ballonangioplastie)                                                      | .4                                                                          | Aorta                                |
|       |                                                                                                |                                                                                           | .c                                                                          | Gefäße Unterschenkel                 |
|       |                                                                                                |                                                                                           | .e                                                                          | Künstliche Gefäße                    |
|       |                                                                                                |                                                                                           | .q                                                                          | Andere Arterien abdominal und pelvin |
|       |                                                                                                |                                                                                           | .s                                                                          | Arterien Oberschenkel                |
|       |                                                                                                |                                                                                           | .x                                                                          | Sonstige                             |
| #E1.2 | 8-836.1*<br>8-836.2*                                                                           | Blade-Angioplastie<br>Laser-Angioplastie                                                  | .4                                                                          | Aorta                                |
|       |                                                                                                |                                                                                           | .c                                                                          | Gefäße Unterschenkel                 |
|       |                                                                                                |                                                                                           | .e                                                                          | Künstliche Gefäße                    |
|       |                                                                                                |                                                                                           | .h                                                                          | Andere Arterien abdominal und pelvin |
|       |                                                                                                |                                                                                           | .k                                                                          | Arterien Oberschenkel                |
|       |                                                                                                |                                                                                           | .x                                                                          | Sonstige                             |
| #E1.3 | 8-840.0* bis .5* 8-841.0* bis .5*<br>8-843.0* bis .5*<br>8-844.0* bis .5*<br>8-845.0* bis .1*q | Stentimplantation                                                                         | .4                                                                          | Aorta                                |
|       |                                                                                                |                                                                                           | .c                                                                          | Gefäße Unterschenkel                 |
|       |                                                                                                |                                                                                           | .e                                                                          | Künstliche Gefäße                    |
|       |                                                                                                |                                                                                           | .q                                                                          | Andere Arterien abdominal und pelvin |
|       |                                                                                                |                                                                                           | .s                                                                          | Arterien Oberschenkel                |
|       |                                                                                                |                                                                                           | .x                                                                          | Sonstige                             |
| #E1.4 | 8-83c.7*                                                                                       | Intraarterielle Spasmolyse an sonstigen Gefäßen                                           | Keine Lokalisationsangabe, nur .70-.72 verfügbar, je nach Anzahl der Gefäße |                                      |
| #E1.5 | 8-84d                                                                                          | (Perkutan-)transluminale Implantation von aus Einzeldrähten verwobenen Nitinolstents      | .4                                                                          | Aorta                                |
|       |                                                                                                |                                                                                           | .c                                                                          | Gefäße Unterschenkel                 |
|       |                                                                                                |                                                                                           | .e                                                                          | Künstliche Gefäße                    |
|       |                                                                                                |                                                                                           | .q                                                                          | Andere Arterien abdominal und pelvin |
|       |                                                                                                |                                                                                           | .s                                                                          | Arterien Oberschenkel                |
|       |                                                                                                |                                                                                           | .x                                                                          | Sonstige                             |
| #E1.6 | 8-849.0*<br>8-849.1*                                                                           | (Perkutan-)transluminale Implantation von sonstigen ungecoverten großlumigen Stents >16mm | .4                                                                          | Aorta                                |
|       |                                                                                                |                                                                                           | .c                                                                          | Gefäße Unterschenkel                 |
|       |                                                                                                |                                                                                           | .e                                                                          | Künstliche Gefäße                    |
|       |                                                                                                |                                                                                           | .q                                                                          | Andere Arterien abdominal und pelvin |
|       |                                                                                                |                                                                                           | .s                                                                          | Arterien Oberschenkel                |
|       |                                                                                                |                                                                                           | .x                                                                          | Sonstige                             |

8-836.0\*: q: Bis 2014: .09: „Andere Gefäße abdominal“, ab 2015: .09: „Andere Gefäße abdominal und pelvin“, ab 2017: .0q  
s: Bis 2016: .0b „Gefäße Oberschenkel“, ab 2017: .0s. 8-836.1/2\*: h: Bis 2014: .\*9: Andere Gefäße abdominal, ab 2015: .\*9:  
Andere Gefäße abdominal und pelvin, Ab 2017: .\*h. k: Bis 2016: .\*b Gefäße Oberschenkel, ab 2017: k. 8-83c.7\*: Existiert  
erst ab 2012, davor nicht verfügbar. 8-84d vor 2018 nicht verfügbar. 8-849.0\*/1\*: Erst ab 2009 vorhanden, davor nicht  
verfügbar, q/s wie bei Stentimplantation

### C) Eingriffe bei arteriellen Embolie/Thrombose:

| OPS Code | Beschreibung                  | Lokalisation: 5./6.Stelle =                                                                                                                           |
|----------|-------------------------------|-------------------------------------------------------------------------------------------------------------------------------------------------------|
| 5-380.** | Inzision, Embolektomie        | .33/.34/.35 Aorta<br>.5* ohne .51 Iliacal<br>.7* Oberschenkel<br>.8* Unterschenkel<br><br>Inkl. „Gefäßprothesen in den entsprechenden Lokalisationen“ |
| 8-836.3* | Atherektomie                  | .4 Aorta                                                                                                                                              |
| 8-836.7* | Selektive Thrombolyse         | .c Gefäße Unterschenkel                                                                                                                               |
| 8-836.8* | Thrombektomie (ohne Rotation) | .e Künstliche Gefäße                                                                                                                                  |
| 8-836.p* | Rotationsthrombektomie        | .h Andere Arterien abdominal und pelvin                                                                                                               |
| 8-836.r* | Kryoplastie                   | .k Arterien Oberschenkel                                                                                                                              |
|          |                               | .x Sonstige                                                                                                                                           |

5-380\*\*: Bis 2009 existieren .35/.56/.73/.87 nicht. Hierbei handelt es sich um „Gefäßprothesen“, Einführung erfolgte in 2010.  
8-836.\*\*: .h: bis 2014: .9: „Andere Gefäße abdominal“, bis 2016: .9 „Andere Gefäße abdominal und pelvin“, .h ab 2017  
\*k: bis 2016: .b: „Gefäße Oberschenkel“, \*k ab 2017

### D) Amputationen:

| OPS Code                    | Beschreibung                          |
|-----------------------------|---------------------------------------|
| <b>#A1.1 Major</b>          |                                       |
| 5-864.0-1, 5-864.2          | Hemipelvektomien/Hüftexartikulationen |
| 5-864.3-5                   | Oberschenkelamputationen              |
| 5-864.6-7                   | Knieexartikulationen                  |
| 5-864.8-9, 5-864.a, 5-865.0 | Unterschenkelamputationen             |
| 5-864.x-y                   | Extremitätenamputation n.n. bez       |
| <b>#A1.2 Minor</b>          |                                       |
| 5-865.1-3                   | Fußamputationen                       |
| 5-865.4-6                   | Vorfuß- und Mittelfußamputationen     |
| 5-865.7-8                   | Zehen- und Zehenstrahlamputationen    |
| 5-865.x-y                   | Sonstige und n.n bez. Fußamputationen |
